# Supplementary material
Source: publisher site journal article supplement (https://www.dovepress.com/article/159516)
Supplement: Supplementary file 1 [file get_supplementary_file.php]

## **Hutt Valley DHB Gastroscopy Access Guidelines**

### **Priority A**

Upper GI haemorrhage/stable/minor episode

Dysphagia: <3 months or progressive

### **Priority AB**

Dysphagia: >3 months and stable

Dyspepsia/heartburn: >50 years or “alarm” symptoms

### **Priority B**

Iron deficiency anaemia

Dyspepsia/heartburn: <50 years and no alarm symptoms

### **Priority C**

Surveillance of Barrett’s epithelium

### Colonoscopy triage decision model

|                                                                                                                                                                | Yes/No | Triage |
|----------------------------------------------------------------------------------------------------------------------------------------------------------------|--------|--------|
| Does examination or imaging show suspected cancer?                                                                                                             | Yes    | A      |
| Rectal bleeding                                                                                                                                                |        |        |
| Anaemia (with low ferritin)                                                                                                                                    |        |        |
| Diarrhoea (greater than 6 weeks)                                                                                                                               |        |        |
| Age $\geq$ 50 years                                                                                                                                            |        |        |
| Age 40-50 years                                                                                                                                                |        |        |
| Category 2 family history: one first degree relative with CRC diagnosed before the age of 55 years or two first degree relatives with CRC diagnosed at any age |        |        |
|                                                                                                                                                                |        |        |
| Rectal bleeding + anaemia                                                                                                                                      | Yes    | A      |
| Rectal bleeding + Diarrhoea + $\geq$ 50 years                                                                                                                  | Yes    | A      |
|                                                                                                                                                                |        |        |
| Rectal bleeding + Diarrhoea + 40-50 years                                                                                                                      | Yes    | AB     |
| Rectal bleeding + $\geq$ 50 years                                                                                                                              | Yes    | AB     |
| Diarrhoea + $\geq$ 50 years                                                                                                                                    | Yes    | AB     |
| Anaemia                                                                                                                                                        | Yes    | AB     |
|                                                                                                                                                                |        |        |
| Rectal bleeding + 40-50 years + Cat 2 family history                                                                                                           | Yes    | AB     |
| Diarrhoea + 40-50 years + Cat 2 family history                                                                                                                 | Yes    | AB     |
| Polyp $>$ 5mm on imaging or examination                                                                                                                        | Yes    | AB     |
|                                                                                                                                                                |        |        |
| Insufficient information to categorise                                                                                                                         |        |        |
| All others refer to gastroenterologist for triage                                                                                                              |        |        |

Instructions: From the referral complete all the Yes/No statements in red. Working down the page, apply the highest triage category that the referral meets. If none of the categories are met or there is insufficient information to categorise the referral then refer to the gastroenterologist and record this in the yellow boxes.

## Gastroscopy triage decision model

|                                                                     | Yes/No | Triage |
|---------------------------------------------------------------------|--------|--------|
| Haematemesis or melaena                                             |        |        |
| Dysphagia <3 months or progressive                                  |        |        |
| Dysphagia >3 months and stable                                      |        |        |
| Dyspepsia (epigastric pain) or heartburn                            |        |        |
| Age >50 years                                                       |        |        |
| Age <= 50 years                                                     |        |        |
| Weight loss                                                         |        |        |
| Anaemia and low ferritin                                            |        |        |
|                                                                     |        |        |
| Haematemesis                                                        | Yes    | A      |
| Dysphagia <3 months or progressive                                  | Yes    | A      |
|                                                                     |        |        |
| Dysphagia >3 months and stable                                      | Yes    | AB     |
| Dyspepsia (epigastric pain) or heartburn + Age >50 years            | Yes    | AB     |
| Dyspepsia (epigastric pain) or heartburn + Weight loss              | Yes    | AB     |
| Dyspepsia (epigastric pain) or heartburn + Anaemia and low ferritin | Yes    | AB     |
|                                                                     |        |        |
| Anaemia and low ferritin                                            | Yes    | B      |
| Dyspepsia (epigastric pain) or heartburn + <= 50 years              | Yes    | B      |
|                                                                     |        |        |
| Insufficient information to categorise                              |        |        |
| All others refer to gastroenterologist for triage                   |        |        |

Instructions: From the referral complete all the Yes/No statements in red. Working down the page, apply the highest triage category that the referral meets. If none of the categories are met or there is insufficient information to categorise the referral then refer to the gastroenterologist and record this in the yellow boxes.
